# Supplementary material for: Characterization and expression profiling of cucumber kinesin genes during early fruit development: revealing the roles of kinesins in exponential cell production and enlargement in cucumber fruit
Source: PubMed Central journal article supplement (PMC3808332; doi:10.1093/jxb/ert269), 2013-09-10
Supplement: supp_ert269_jexbot101881_file001.pdf [file supp_ert269_jexbot101881_file001.pdf]

## Supplementary Data

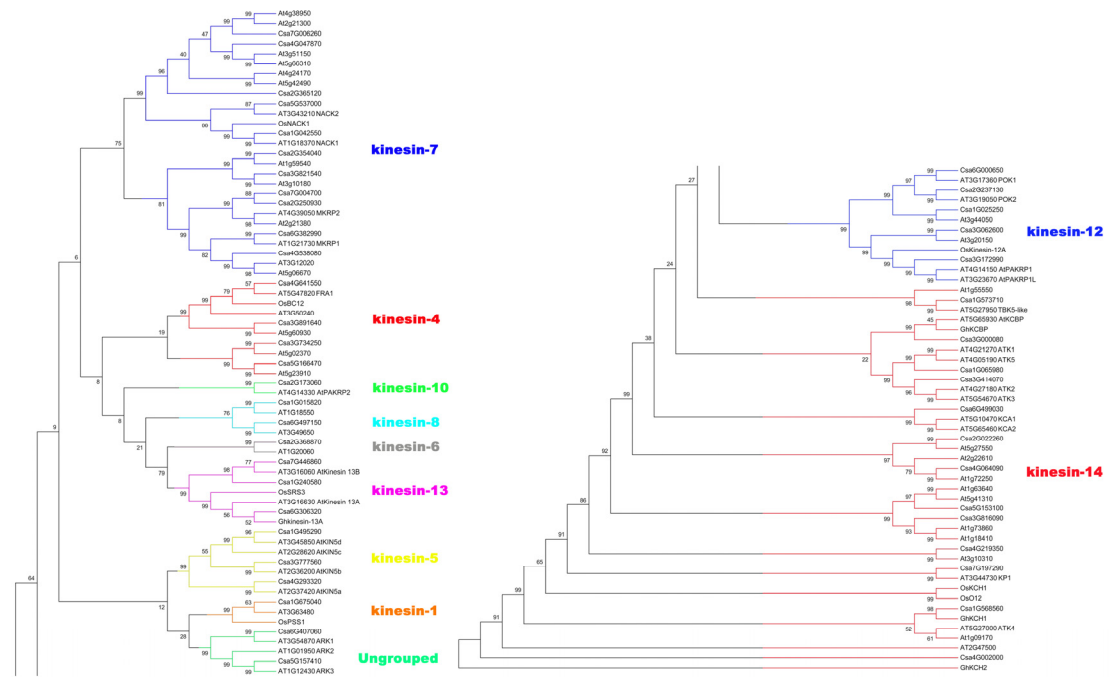

**Fig. S1** Phylogenetic analysis of predicted cucumber kinesins and other representatives of kinesins in plant indicated that all predicted kinesins distribute in 14 families and one plant-specific ungrouped family.

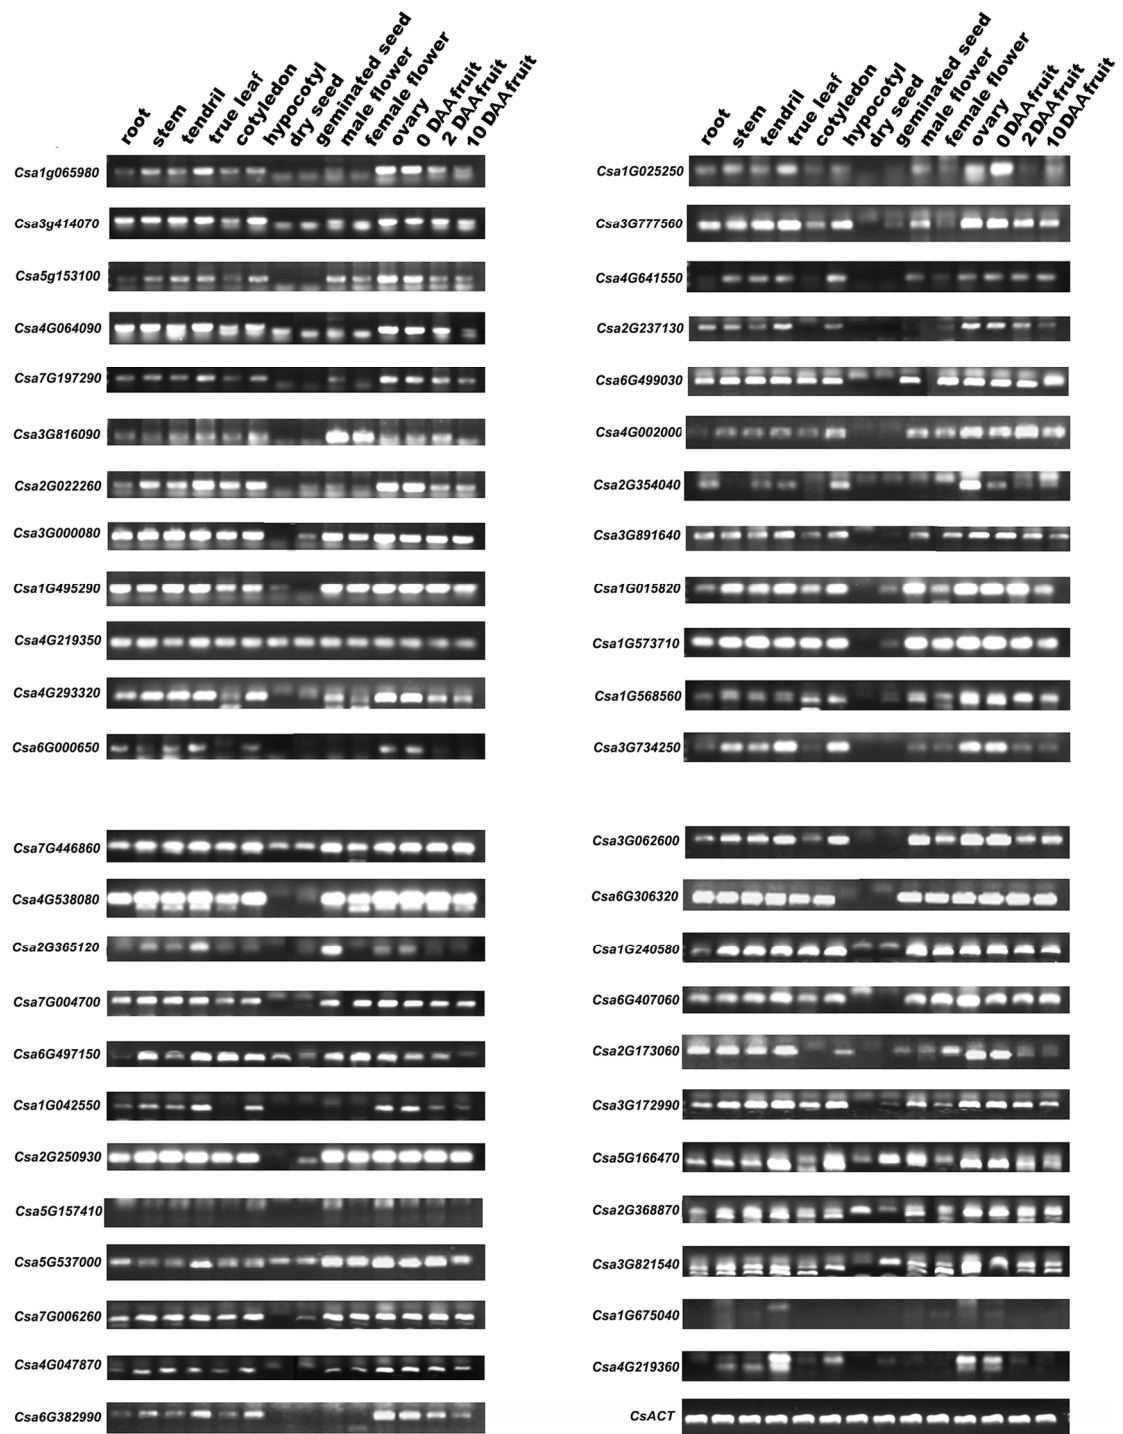

**Fig. S2** Expression of forty-seven cucumber kinesin genes during vegetative (root, stem, tendril, true leaf, cotyledon and hypocotyl) and reproductive development (dry seed, geminated seed, male flower, female flower, ovary, 0 DAA fruit, 2 DAA fruit and 10 DAA fruit) by using RT-PCR.

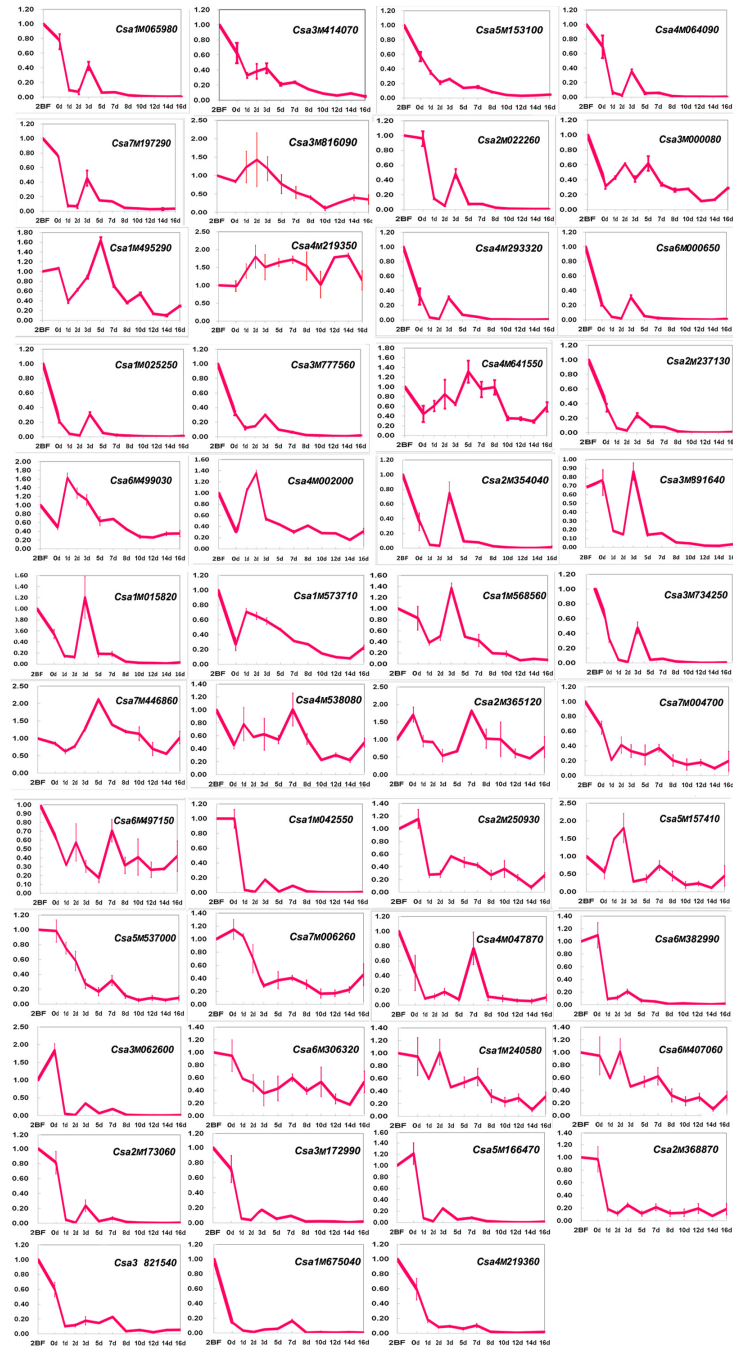

**Fig. S3** Expression profiles of kinesin family genes during early fruit development in cucumber. Quantitative RT-PCR results of the expression of 47 kinesin genes during early 9930 fruit development. These data represent the fold changes in expression relative to the expression at -2 DAA. The error bars represent the standard error of the means (n=3).

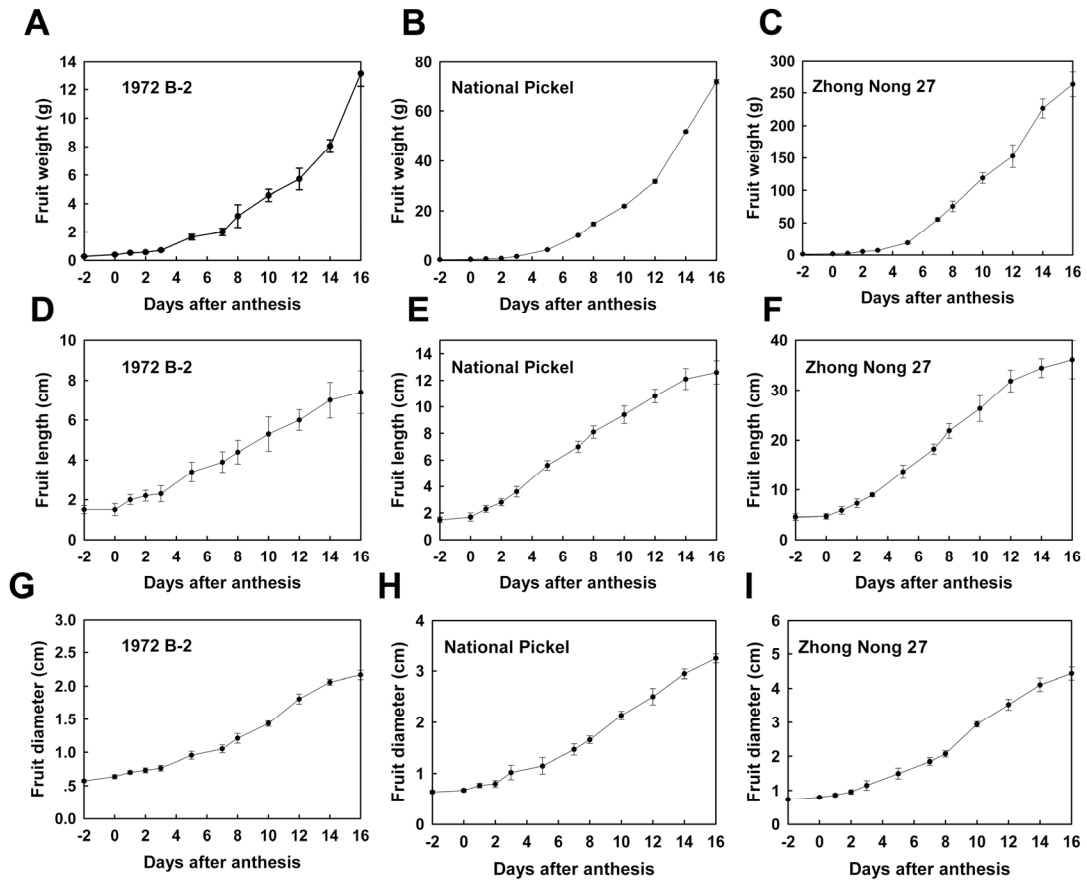

**Fig. S4** Physiological changes in 1972 B-2, National Pickle and Zhong Nong 27 during early fruit development. Increase in weight of 1972 B-2 (A), National Pickle (B) and Zhong Nong 27 (C) fruit during early fruit development. Increase in length of 1972 B-2 (D), National Pickle (E) and Zhong Nong 27 (F) fruit during early fruit development. Increase in diameter of 1972 B-2 (G), National Pickle (H) and Zhong Nong 27 (I) fruit during early fruit development.

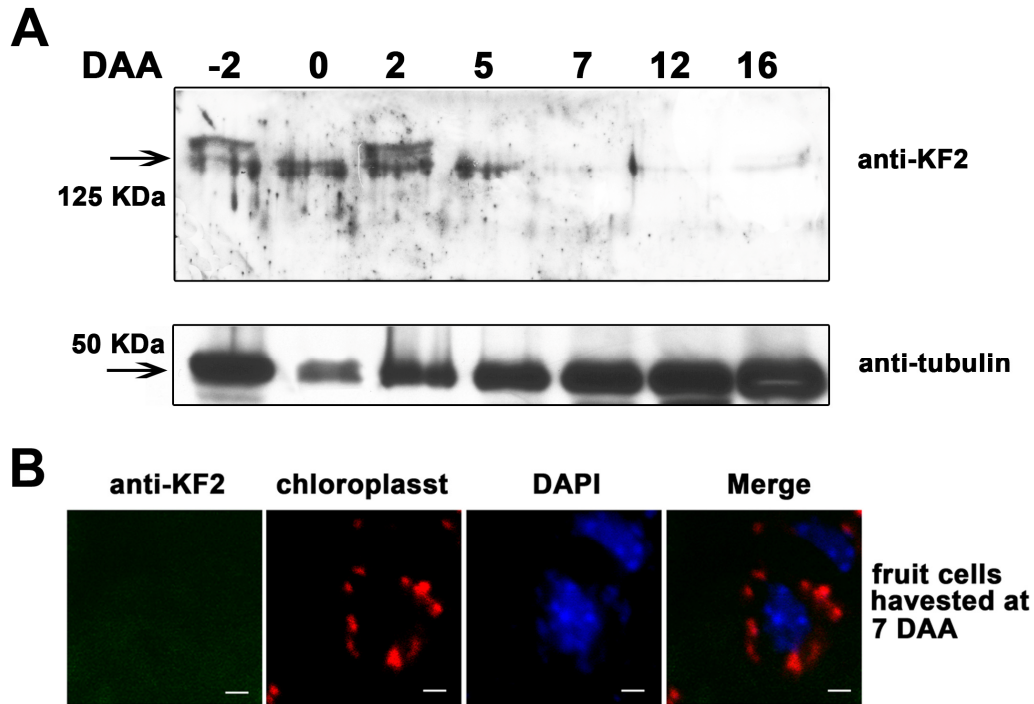

**Fig. S5** Protein expression patterns of CsKF2 during cucumber early fruit development. (A) CsKF2 proteins exist predominantly in early stage (before 5 DAA) of cucumber fruit development. (B) It was failed to immunolable CsKF2 in fruit cells harvested at 7 DAA.

**Table S1** Sequence-specific primers used for construction.

F represents forward; R represents reverse.

| Construct | Primer sequence (5' to 3')                                      | Restriction site |
|-----------|-----------------------------------------------------------------|------------------|
| KF1-N     | F: GAATTCATGAATGGAATGGGGAGA; R: GTCGACTCAAGAGTTGCCCTCTCT        | EcoR I Sal I     |
| KF1-M     | F: GGATCCATGGTTGCCAAGATCAAAG; R: CTCGAGTCAGACATTATTCCTTTTGAAAG  | BamH I Xho I     |
| KF2-C     | F: GGTACCATGGTCTTGGACATGCTAG; R: CTCGAGTTAATAGTGCTGCTCTTGA      | Kpn I Xho I      |
| KF2-M     | F: GGTACCATGGATCCACCCATCAAAG; R: CTCGAGTCAITCATTATGATTGGCTGA    | Kpn I Xho I      |
| KF3-M     | F: GAATTCATGAAGGGTAGCATAAGAGTTT; R: GTCGACTCAGTTCACGAGCAG       | EcoR I Sal I     |
| KF3-C     | F: GGTACCATGCAAATCGAGAATCCA; R: CTCGAGTTATTGTTTCTATTCCAGTTC     | Kpn I Xho I      |
|           | For transient expression                                        |                  |
| KF1       | F: ACTAGTATGAATGGAATGGGGAGAC; B: GTCGACGTCAGATGAAGATATAAGTACA   | Spe I Sal I      |
|           | For transient expression                                        |                  |
| KF2       | F: GTCGACATGAAGTCGAATCCAACAGG; B: GGTACCATAGTGCTGCTCTTGATATATAG | Sal I Kpn I      |

**Table S2** Specific primers used for RT-PCR and quantitative RT-PCR.

F represents forward; R represents reverse.

| Genes              | Primers                                                  |
|--------------------|----------------------------------------------------------|
| <i>Csa1M065980</i> | F: TCTTCTCCAGCCATGCCTAG<br>R: AATCTACAGGTCGCATGGTTG      |
| <i>Csa3M414070</i> | F: CTATCTTCTTCAGCCATGTCTCG<br>R: GTCGTGTATTGGTTAAACGCC   |
| <i>Csa5M153100</i> | F: TCCAGAAAAACCAATCCACC<br>R: CACCAATTGGAGAGCTTTTTTG     |
| <i>Csa4M064090</i> | F: GACAAGGTCAAAGAAGCTGAAGC<br>R: GACTACCTAACGGTCGACTTGC  |
| <i>Csa7M197290</i> | F: GAACCACCACCAAGAATGACA<br>R: GGTATTACCAAAAAATTCCCGC    |
| <i>Csa3M816090</i> | F: GTTGAAAAGCCCAGATCTACA<br>R: GCCATCTTCTACCAGACTTGAGTC  |
| <i>Csa2M022260</i> | F: CAAGAAAAGGTTGAGATATCGAG<br>R: GCGGTTTCTTCTCTGGAAT     |
| <i>Csa3M000080</i> | F: CTCATGTATGCATCAAGAGTTG<br>R: CTTTAGTATGTCGCTCGTTTTGG  |
| <i>Csa1M495290</i> | F: GAATACACGGTTGATGAACCATC<br>R: CCAGCTAAATGCTTTACATCTCC |
| <i>Csa4M219350</i> | F: GCTCTGAGAAGAAACAATATTACAGG<br>R: TCTAGATTTTCTGCCCCTGT |
| <i>Csa4M293320</i> | F: GATTATCTGGTCGATCAGCATTG<br>R: GAACTTTTCTTCTATCAAACCCC |
| <i>Csa6M000650</i> | F: GGGATACTGAAGACGAAAACA<br>R: TTTGAGTTAGCCAACCTCATTG    |
| <i>Csa1M025250</i> | F: GCTGAAAAGGCATGTAGATGAAT                               |

|                    |                                                            |
|--------------------|------------------------------------------------------------|
|                    | R: ATGGCATCGACCATCGTC                                      |
| <i>Csa3M77560</i>  | F: CAATATGGGGACTATGAGCCA<br>R: GATGGTTTCTTTGCCATTACTC      |
| <i>Csa4M641550</i> | F: TCGTGTAGGAGTTGAATGGTACC<br>R: TGCCTGATCCATTCTGAAAGT     |
| <i>Csa2M237130</i> | F: CGTTTTAAAGGCAGCTGGAG<br>R: TCTTTGAACTTTCGGTGAAGG        |
| <i>Csa6M499030</i> | F: TCGTCAGATAGTTGAGTTACTCCA<br>R: CACCACACTTGATGATAAAAGGAG |
| <i>Csa4M002000</i> | F: GCCCAGAGTTAAGCAAGAACTTC<br>R: TGTTTTCTATTCCAGTTCTGCG    |
| <i>Csa2M354040</i> | F: TCTTCTCAGAGTGCCAAA<br>R: GCTCCACGAAGTACGTCATAT          |
| <i>Csa3M891640</i> | F: CACATTGGTAAAATCAAAGGCA<br>R: AACGGGATGTTGACAACCTC       |
| <i>Csa1M015820</i> | F: CAGAATAAGGTTGCAGAAGCA<br>R: CAGGGATTGTGCCTGTAATGT       |
| <i>Csa1M573710</i> | F: CTACAGGAGGACTGAAGAAGCA<br>R: CACGTGGATGATGATCGCTA       |
| <i>Csa1M568560</i> | F: CGGAGGCTCAAAGCAAG<br>R: ACCATAGCTTTGTCGTCCA             |
| <i>Csa3M734250</i> | F: TTGAATACAGCAAGCAGAGAGG<br>R: CTCTTGACGCTTGCTGAATAAG     |
| <i>Csa7M446860</i> | F: CTGTTGCAGGAAGAGGAAGATC<br>R: ATAGATTGCTGCAGCCTTTTG      |
| <i>Csa4M538080</i> | F: GATTAGCACAGGAGTTGATGAA<br>R: CAACTTCTCTGATAAGGCTTTGAG   |
| <i>Csa2M365120</i> | F: CAAACTTCAAGCTTGAAGGCTC<br>R: TCTCGACCATAACATTCGTGC      |

|                    |                                                           |
|--------------------|-----------------------------------------------------------|
| <i>Csa7M004700</i> | F: TAAAGGCACGGATGCAAGA<br>R: CGGAACAAGCAAGTGAGCA          |
| <i>Csa6M497150</i> | F: CTGGAATAGAGGAAGGAAGCC<br>R: CCACCATGAAAAGAATGACTTGT    |
| <i>Csa1M042550</i> | F: TCGCTCGTCAAGCATGAG<br>R: GGATTCGTCCAGAGCTTGTTTA        |
| <i>Csa2M250930</i> | F: CTCAAGGCAAAGATGCAGG<br>R: CGGAACAAGCAAGAGAACAAG        |
| <i>Csa5M157410</i> | F: TAGCACAGCATGAAGTGAACG<br>R: CCGTAATCGTCTCATTTCAGC      |
| <i>Csa5M537000</i> | F: CTGTTTATGCAAGTGCAAGGCT<br>R: GGATCTGTCCATAGCTTGTTTAC   |
| <i>Csa7M006260</i> | F: ACGGTCAGGTTCTGGAGGAT<br>R: TTGAGACGTTGCAAGTTGC         |
| <i>Csa4M047870</i> | F: CTGACACAAGCATTGAGTTTGA<br>R: TTCCACACAAGATGAGCCAA      |
| <i>Csa6M382990</i> | F: TCCCAAGTTATGCAGGCTG<br>R: GGTAACCTTTCAGCTAAGTTTTGG     |
| <i>Csa3M062600</i> | F: CATCAGTTGCAGAGGAGAGTTTTA<br>B: TCGTCATGATACAGTGGTTCAAG |
| <i>Csa6M306320</i> | F: GGAGATAGTGCGAGAAGAAATGA<br>B: CTTTTTCGGCTCAGTATCTCTTG  |
| <i>Csa1M240580</i> | F: CGACATTGTTAGAGAGGAGATGAAC<br>B: GTGCCACAAAACATTGTATTC  |
| <i>Csa6M407060</i> | F: GCGCAAAATGAGGAAAATG<br>B: ATGAGCCTGAACCTGAGCC          |
| <i>Csa2M173060</i> | F: TCAGACCTGACGAACCAGAAT<br>B: GTGCCCGGTAGCTTGTTCT        |
| <i>Csa3M172990</i> | F: CTGCTCAGATGCGAGCAAT                                    |



|                               |                               |
|-------------------------------|-------------------------------|
|                               | B: TGCTTTCATCATCATAAGCAGG     |
|                               | F: CACAGCTAGCAAGGAAGAATTG     |
| <i>Csa5M166470</i>            | B: GCTCACCAGCTTCTTTTTTCAT     |
|                               | F: ACCAAAAAGGAGACTTCTGCC      |
| <i>Csa2M368870</i>            | B: ATGCGAATGAGGGAGATGTT       |
|                               | F: GATGCATGATGATGAGGTCA       |
| <i>Csa3M821540</i>            | B: TTCTCAAGTCCTTCGTGGC        |
|                               | F: ATAGTATGGAGGGCCTGGT        |
| <i>Csa1M675040</i>            | B: GCTGGAAAATAATCATAACCAGTAGC |
|                               | F: CACACCATGAATGGTCCATCT      |
| <i>Csa4M219360</i>            | B: AGAAGGTCTCGGACTTGTTCATT    |
|                               | F: TCCACGAGACTACCTACAATC      |
| <i>Csa6a484600 (Cs.ACTIN)</i> | B: GTCATACGGTCAGCGAT          |

**Table S3. List of predicted kinesin genes in cucumber**

| <b>Gene ID</b>     | <b>predicted protein length (aa)</b> | <b><i>Arabidopsis</i> homologue</b> | <b>Gene ID</b>     | <b>predicted protein length (aa)</b> | <b><i>Arabidopsis</i> homologue</b> |
|--------------------|--------------------------------------|-------------------------------------|--------------------|--------------------------------------|-------------------------------------|
| <i>Csa1M065980</i> | 798                                  | ATK1                                | <i>Csa7M446860</i> | 685                                  | KINESIN-13B                         |
| <i>Csa3M414070</i> | 752                                  | ATK3                                | <i>Csa4M538080</i> | 765                                  | AT5G06670                           |
| <i>Csa5M153100</i> | 1119                                 | AT1G63640                           | <i>Csa2M365120</i> | 956                                  | AT2G21300                           |
| <i>Csa4M064090</i> | 1118                                 | AT1G72250                           | <i>Csa7M004700</i> | 1068                                 | MKRP2                               |
| <i>Csa7M197290</i> | 1195                                 | KP1                                 | <i>Csa6M497150</i> | 698                                  | AT3G49650                           |
| <i>Csa3M816090</i> | 1374                                 | AT1G18410                           | <i>Csa1M042550</i> | 960                                  | HINKEL                              |
| <i>Csa2M022260</i> | 794                                  | AT5G27550                           | <i>Csa2M250930</i> | 1083                                 | MKRP2                               |
| <i>Csa3M000080</i> | 1265                                 | ZWI                                 | <i>Csa5M157410</i> | 914                                  | ARK3                                |
| <i>Csa1M495290</i> | 1051                                 | AT3G45850                           | <i>Csa5M537000</i> | 938                                  | TETRASPORE                          |
| <i>Csa4M219350</i> | 554                                  | AT3G10310                           | <i>Csa7M006260</i> | 1027                                 | AT2G21300                           |
| <i>Csa4M293320</i> | 1049                                 | AT2G37420                           | <i>Csa4M047870</i> | 993                                  | AT3G51150                           |

|                    |      |           |                    |      |             |
|--------------------|------|-----------|--------------------|------|-------------|
| <i>Csa6M000650</i> | 2224 | POK1      | <i>Csa6M382990</i> | 1091 | MKRP1       |
| <i>Csa1M025250</i> | 1393 | AT3G44050 | <i>Csa3M062600</i> | 1139 | AT3G20150   |
| <i>Csa3M777560</i> | 1009 | AT2G36200 | <i>Csa6M306320</i> | 805  | KINESIN-13A |
| <i>Csa4M641550</i> | 1050 | FRA1      | <i>Csa1M240580</i> | 715  | AT3G16060   |
| <i>Csa2M237130</i> | 2916 | POK2      | <i>Csa6M407060</i> | 1060 | ARK1        |
| <i>Csa6M499030</i> | 1276 | KCA1/KAC1 | <i>Csa2M173060</i> | 843  | PAKRP2      |
| <i>Csa4M002000</i> | 1022 | AT2G47500 | <i>Csa3M172990</i> | 1342 | KINESIN-12B |
| <i>Csa2M354040</i> | 842  | ZCF125    | <i>Csa5M166470</i> | 712  | AT5G23910   |
| <i>Csa3M891640</i> | 1274 | AT5G60930 | <i>Csa2M368870</i> | 870  | AT1G20060   |
| <i>Csa1M015820</i> | 759  | AT1G18550 | <i>Csa3M821540</i> | 1251 | AT3G10180   |
| <i>Csa1M573710</i> | 631  | AT5G27950 | <i>Csa1M675040</i> | 171  | AT3G63480   |
| <i>Csa1M568560</i> | 1094 | ATK4      | <i>Csa4M219360</i> | 537  | ATK4        |
| <i>Csa3M734250</i> | 622  | AT5G02370 |                    |      |             |

47 kinesin genes were identified in cucumber genome by using the conserved motor domains of *Arabidopsis*, rice and mouse as queries to blast in cucumber genome database, and all these kinesins have corresponding homologues in *Arabidopsis*.

**Table S4.** Twelve cucumber kinesin genes showed the peak expressions in the rapid cell division phase (before 3 DAA) or cell expansion phase (after 5 DAA)

| peak expressions are induced in rapid cell division phase (before 3 DAA) |                              | peak expressions are induced in rapid cell expansion phase (after 5 DAA) |                              |
|--------------------------------------------------------------------------|------------------------------|--------------------------------------------------------------------------|------------------------------|
| Gene ID                                                                  | <i>Arabidopsis</i> homologue | Gene ID                                                                  | <i>Arabidopsis</i> homologue |
| <i>Csa3M816090</i>                                                       | AT1G18410                    | <i>Csa1M495290</i>                                                       | AT3G45850                    |
| <i>Csa6M499030</i>                                                       | KCA1/KAC1                    | <i>Csa7M446860</i>                                                       | KINESIN-13B                  |
| <i>Csa4M002000</i>                                                       | AT2G47500                    |                                                                          |                              |
| <i>Csa1M568560</i>                                                       | ATK4                         |                                                                          |                              |
| <i>Csa1M042550</i>                                                       | HINKEL                       |                                                                          |                              |

|                    |           |
|--------------------|-----------|
| <i>Csa2M250930</i> | MKRP2     |
| <i>Csa5M157410</i> | ARK3      |
| <i>Csa6M382990</i> | MKRP1     |
| <i>Csa3M062600</i> | AT3G20150 |
| <i>Csa5M166470</i> | AT5G23910 |

**Table S5. A predicted chloroplast transit peptides (cTP) in N-terminus of CsKF2**

| Name  | Length  | Score | chloroplast transit peptides (cTP) | Score for the suggested cleavage site | cTP- length |
|-------|---------|-------|------------------------------------|---------------------------------------|-------------|
| CsKF2 | 1139 aa | 0.569 | Yes                                | -0.412                                | 1 aa-38 aa  |

A chloroplast transit peptides (cTP) locating in CsKF2-N terminus (1 aa – 38 aa) was predicted by ChloroP 1.1 Server at <http://www.cbs.dtu.dk/services/ChloroP/>.
